# Supplementary material for: Enlarging the porosity of metal–organic framework-derived carbons for supercapacitor applications by a template-free ethylene glycol etching method
Source: Royal Society of Chemistry journal article supplement (doi:10.1039/d2ta06307g), 2022-11-02
Supplement: d2ta06307g1.pdf [file d2ta06307g1.pdf]

## **Supporting Information**

### **Enlarging the Porosity of Metal-Organic Framework Derived Carbons for Supercapacitor Applications by Template-Free Ethylene Glycol Etching Method**

Ruijing Xin,<sup>a</sup> Minjun Kim,<sup>\*,a</sup> Ping Cheng,<sup>a</sup> Aditya Ashok,<sup>a</sup> Silvia Chowdhury,<sup>a</sup> Teahoon Park,<sup>b</sup> Azhar Alowasheer,<sup>c</sup> MD Shahriar Hossain,<sup>d</sup> Jing Tang,<sup>e</sup> Jin Woo Yi,<sup>\*,b</sup> Yusuke Yamauchi,<sup>a,c</sup> Yusuf Valentino Kaneti,<sup>\*,a</sup> and Jongbeom Na<sup>\*,f</sup>

<sup>a</sup> *Australian Institute for Bioengineering and Nanotechnology (AIBN), The University of Queensland, Brisbane, QLD 4072, Australia. E-mail: v.kaneti@uq.edu.au; minjun.kim@uq.edu.au*

<sup>b</sup> *Carbon Composite Department, Composites Research Division, Korea Institute of Materials Science (KIMS), 797, Changwon-daero, Seongsan-gu, Changwon-si 51508, Gyeongsangnam-do Republic of Korea. E-mail: yjw0628@kims.re.kr*

<sup>c</sup> *JST-ERATO Yamauchi Materials Space-Tectonics Project International Center for Materials Nanoarchitectonics (WPI-MANA), National Institute for Materials Science, 1-1 Namiki, Tsukuba, Ibaraki 305-0044, Japan.*

<sup>d</sup> *School of Mechanical and Mining Engineering, Faculty of Engineering, Architecture, and Information Technology (EAIT), The University of Queensland, Brisbane, QLD 4072, Australia.*

<sup>e</sup> *School of Chemistry and Molecular Engineering, Shanghai Key Laboratory of Green Chemistry and Chemical Processes, Institute of Eco-Chongming, East China Normal University, Shanghai 200062, China*

<sup>f</sup> *Materials Architecturing Research Center, Korea Institute of Science and Technology, Seoul, Republic of Korea. E-mail: jongbeom@kist.re.kr*

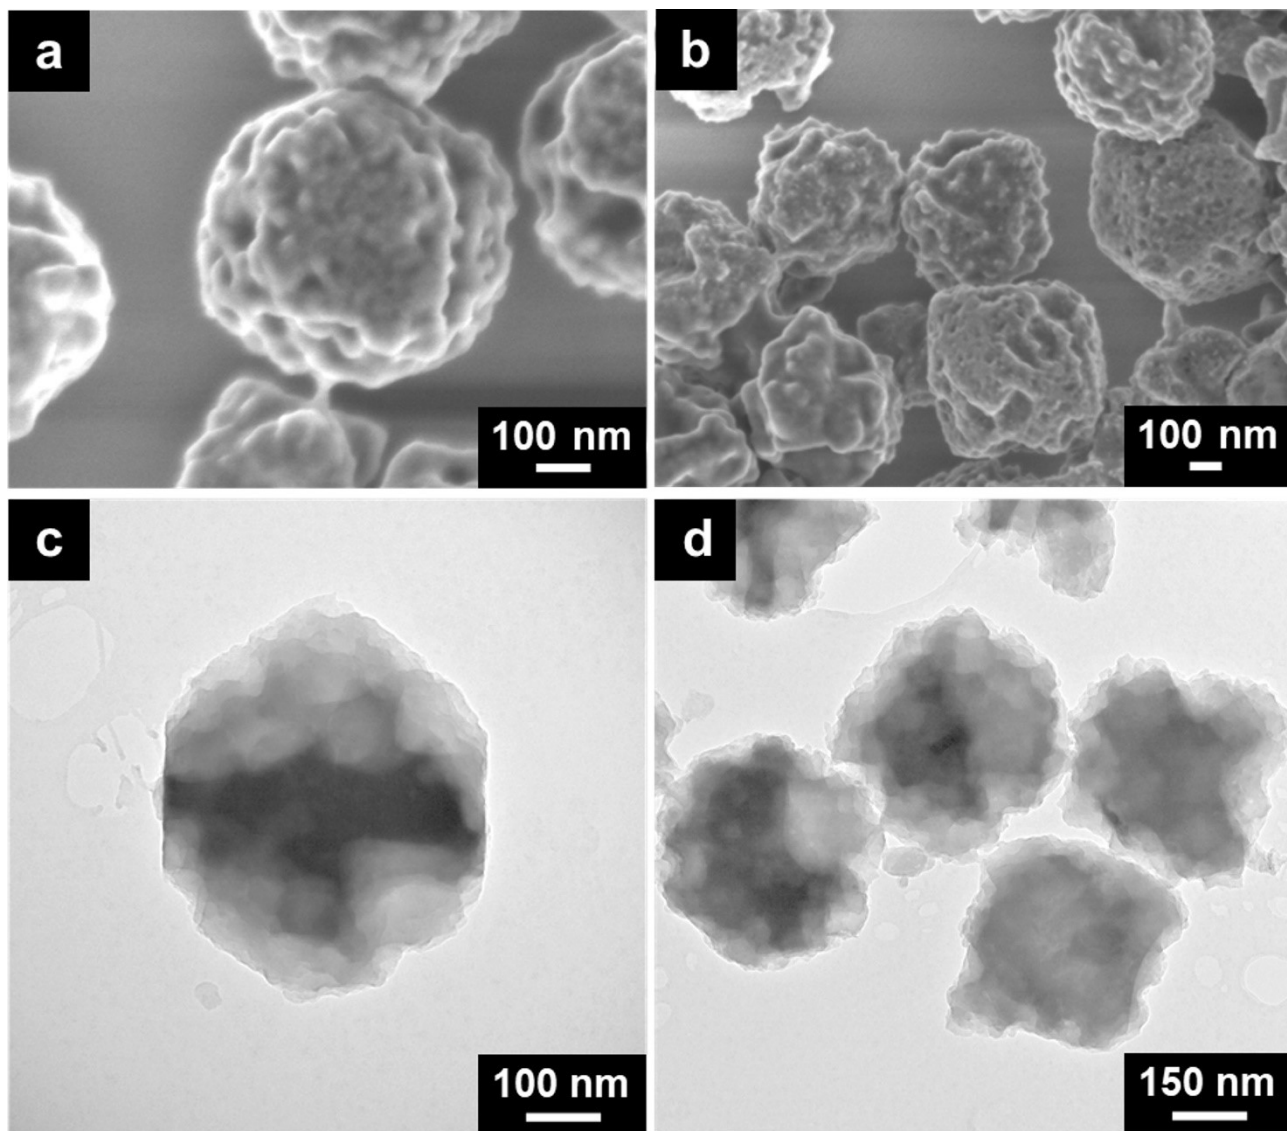

**Fig. S1.** (a, b) SEM and (c, d) TEM images of etched  $\text{Zn}_{33}\text{Co}_{67}\text{-ZIF}$ .

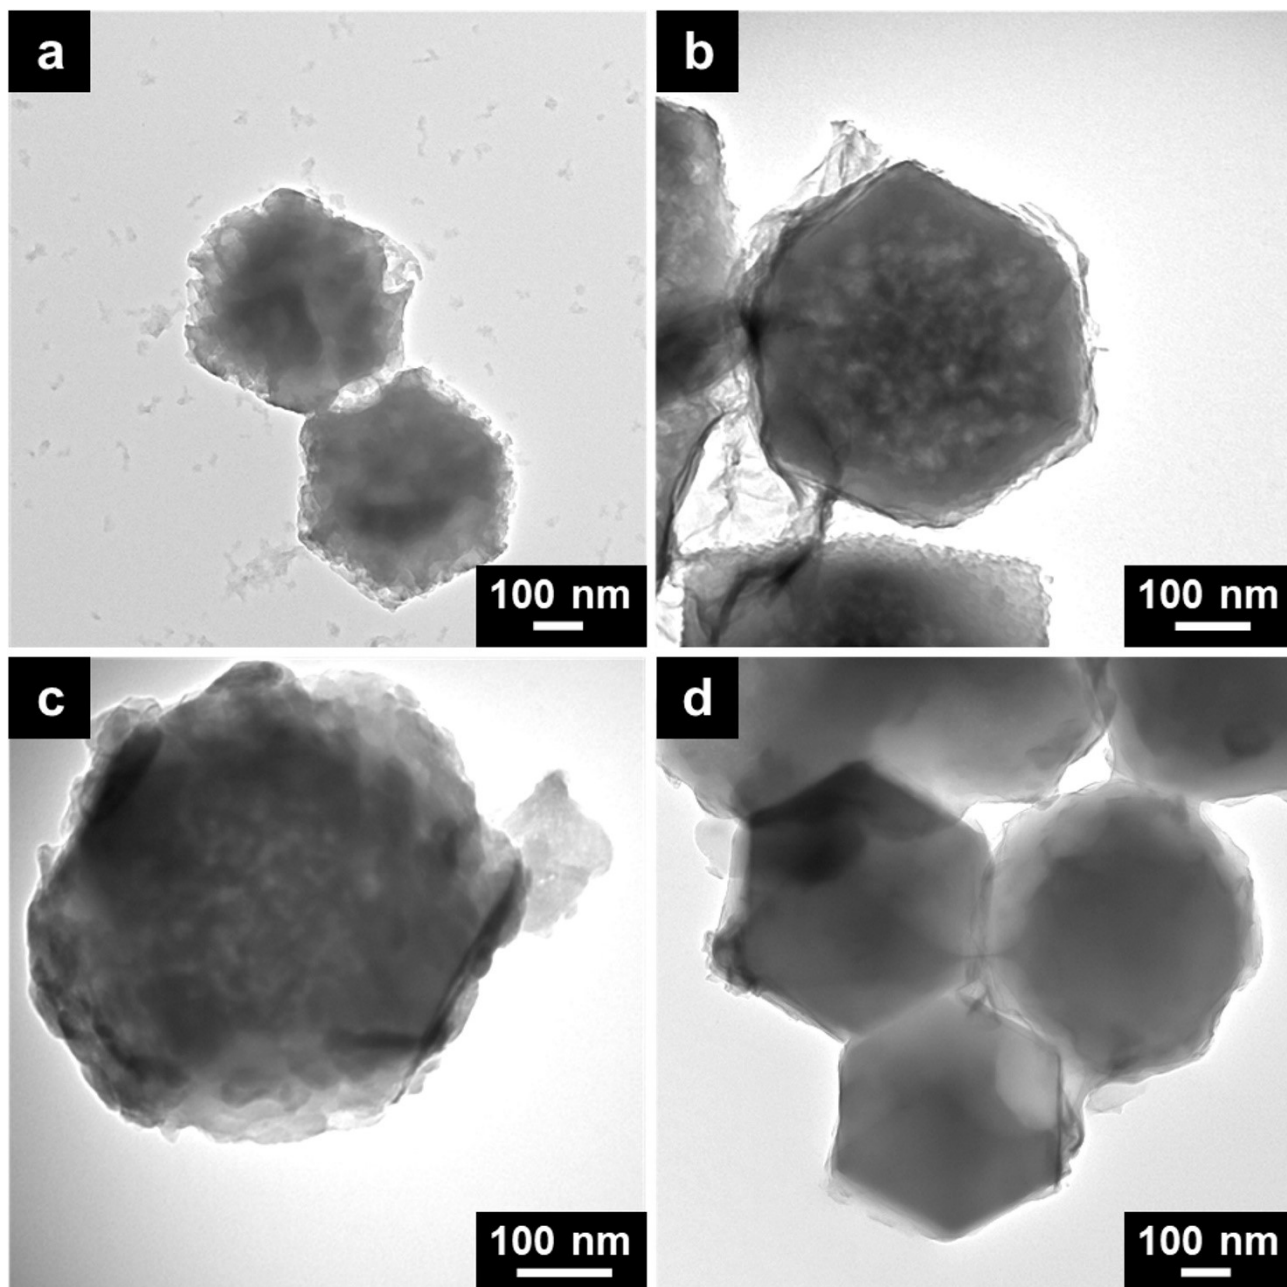

**Fig. S2.** TEM images of Zn<sub>33</sub>Co<sub>67</sub>-ZIF obtained with (a) 95EG : 5DW, (b) 50EG : 50DW, (c) 20EG : 80DW, and (d) 100DW.

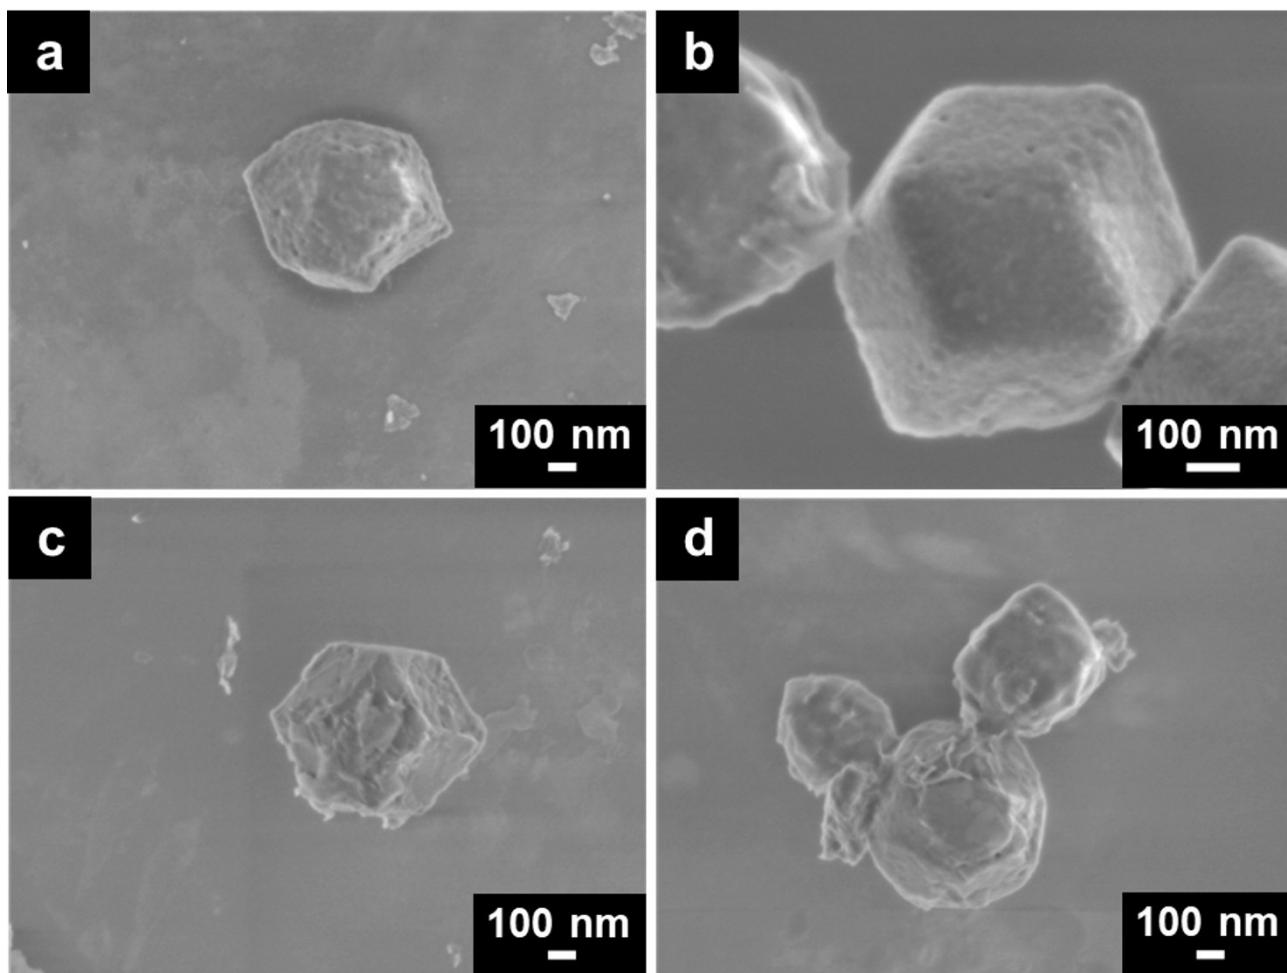

**Fig. S3.** SEM images of Zn<sub>33</sub>Co<sub>67</sub>-ZIF obtained with (a) 95EG : 5DW, (b) 50EG : 50DW, (c) 20EG : 80DW, and (d) 100DW.

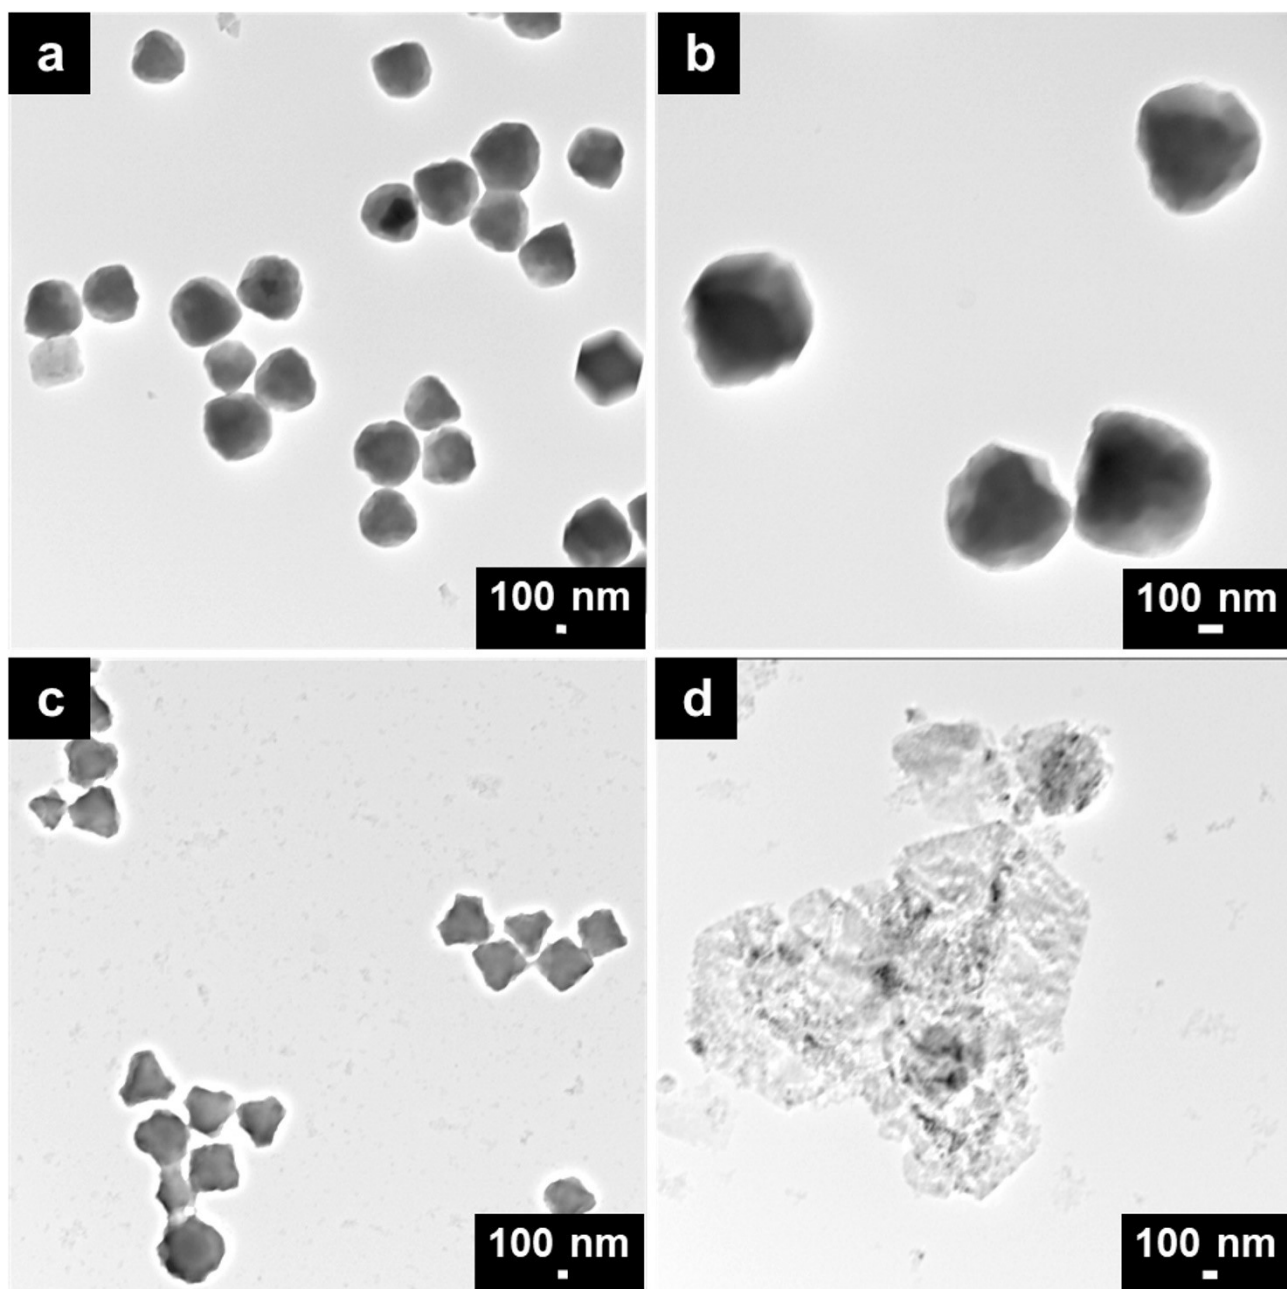

**Fig. S4.** TEM images of ZIF-67 obtained with (a, b) 95EG : 5DW, (c) 80EG : 20DW and (d) 100DW.

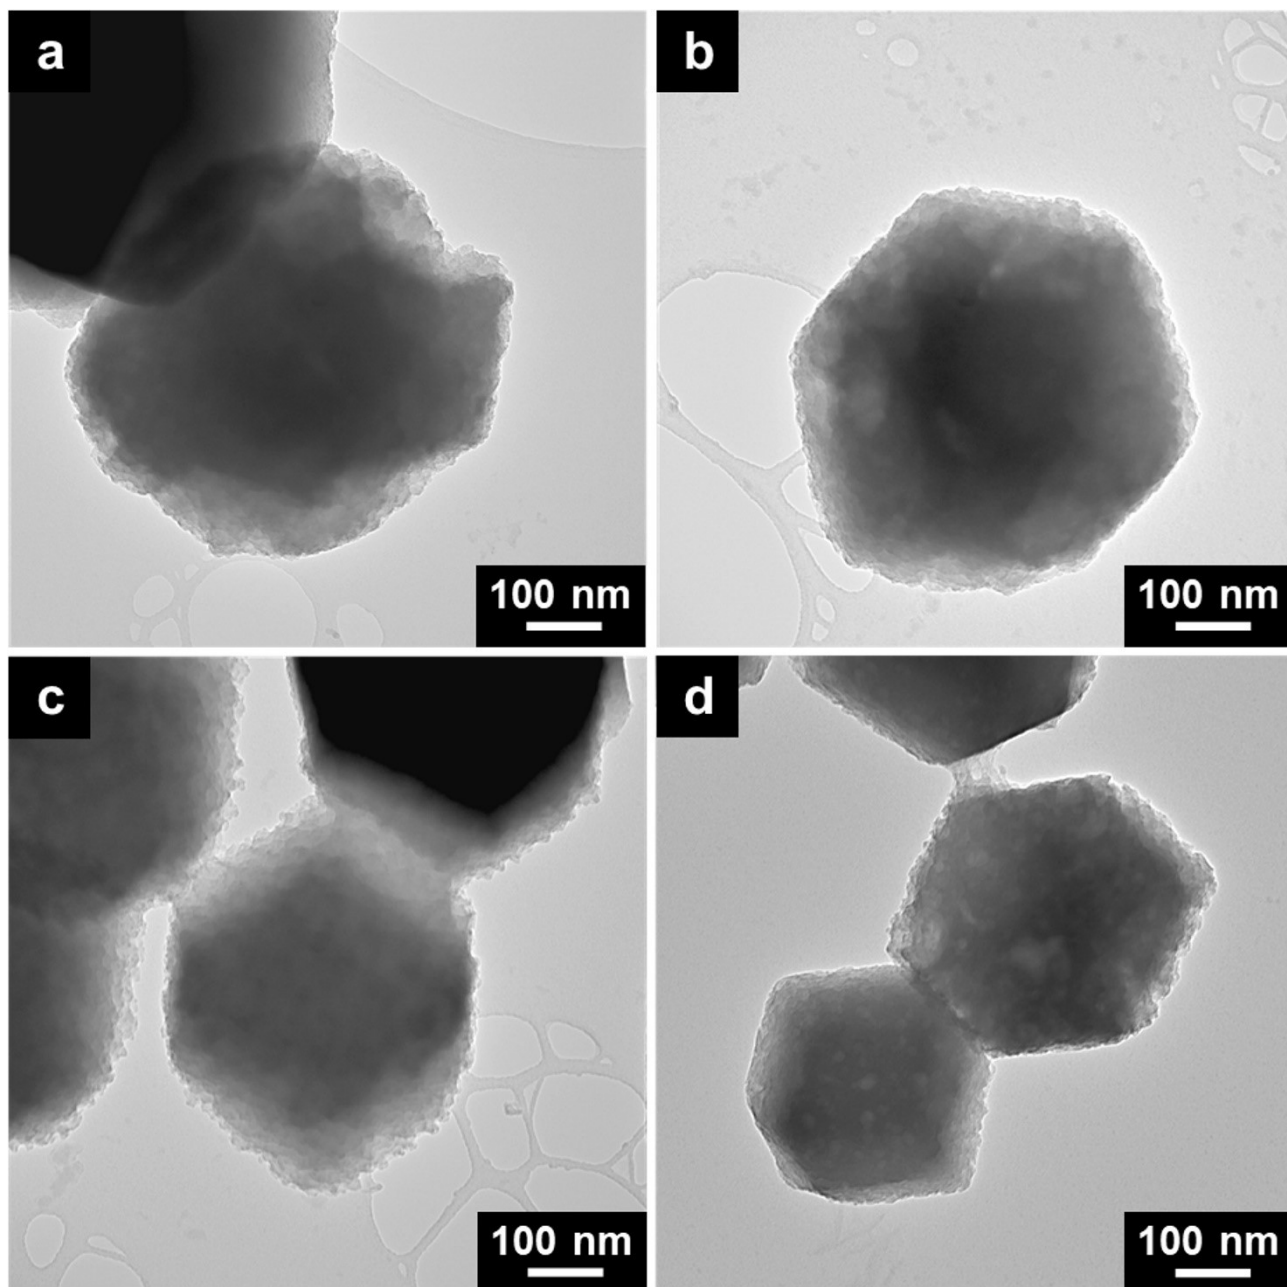

**Fig. S5.** TEM images of (a)  $\text{Zn}_{67}\text{Co}_{33}\text{-ZIF}$ , (b)  $\text{Zn}_{50}\text{Co}_{50}\text{-ZIF}$ , (c)  $\text{Zn}_{25}\text{Co}_{75}\text{-ZIF}$ , and (d)  $\text{Zn}_{10}\text{Co}_{90}\text{-ZIF}$  obtained with 95EG : 5DW.

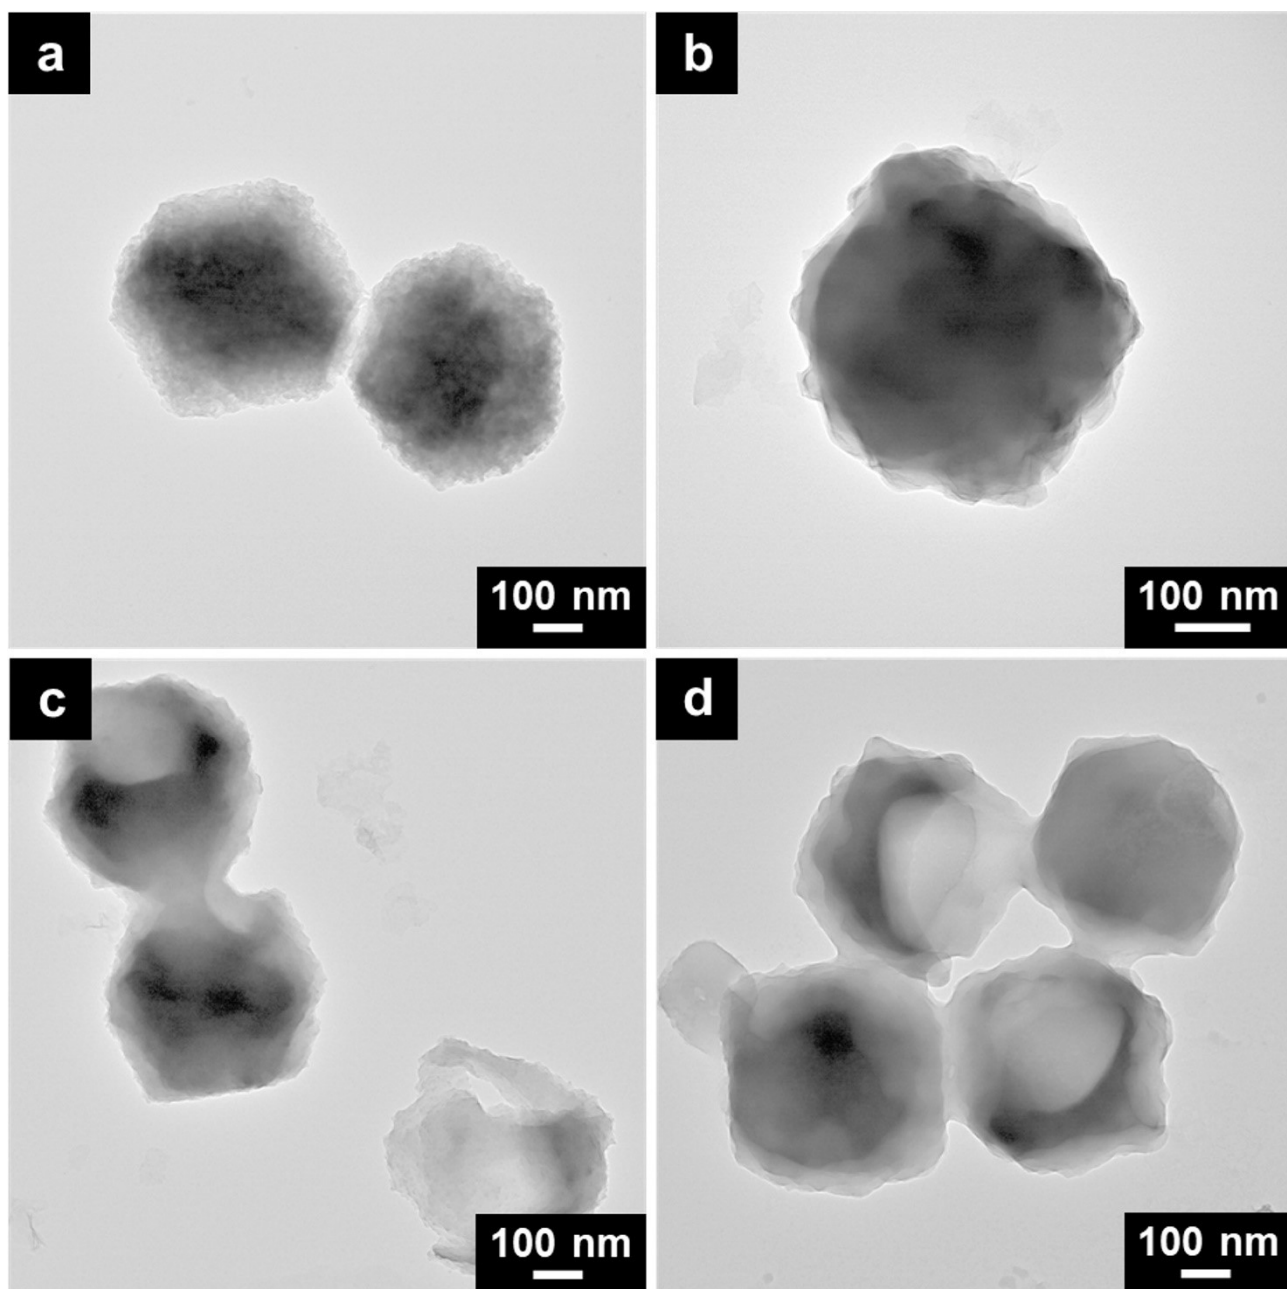

**Fig. S6.** TEM images of Zn<sub>33</sub>Co<sub>67</sub>-ZIF obtained with 95EG : 5DW using a sonication time of (a) 1.5 hours, (b) 3 hours, (c) 6 hours, and (d) 9 hours.

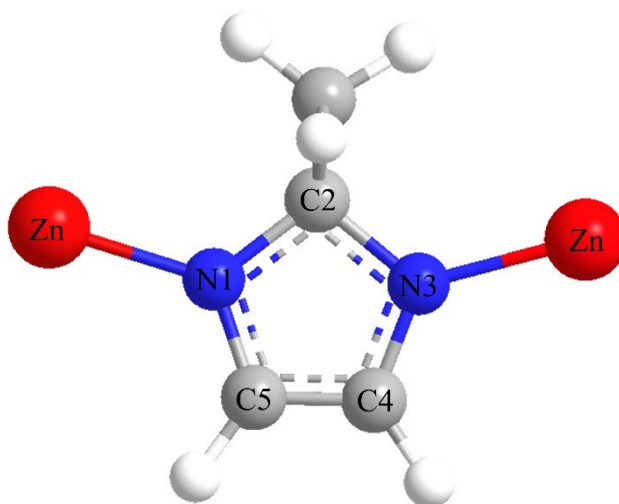

**Fig. S7.** Schematic illustration of the atom nomenclature used for the imidazolium ring in ZIF, where nitrogen, carbon, hydrogen, and zinc atoms are represented by the blue, grey, white, and red spheres, respectively.

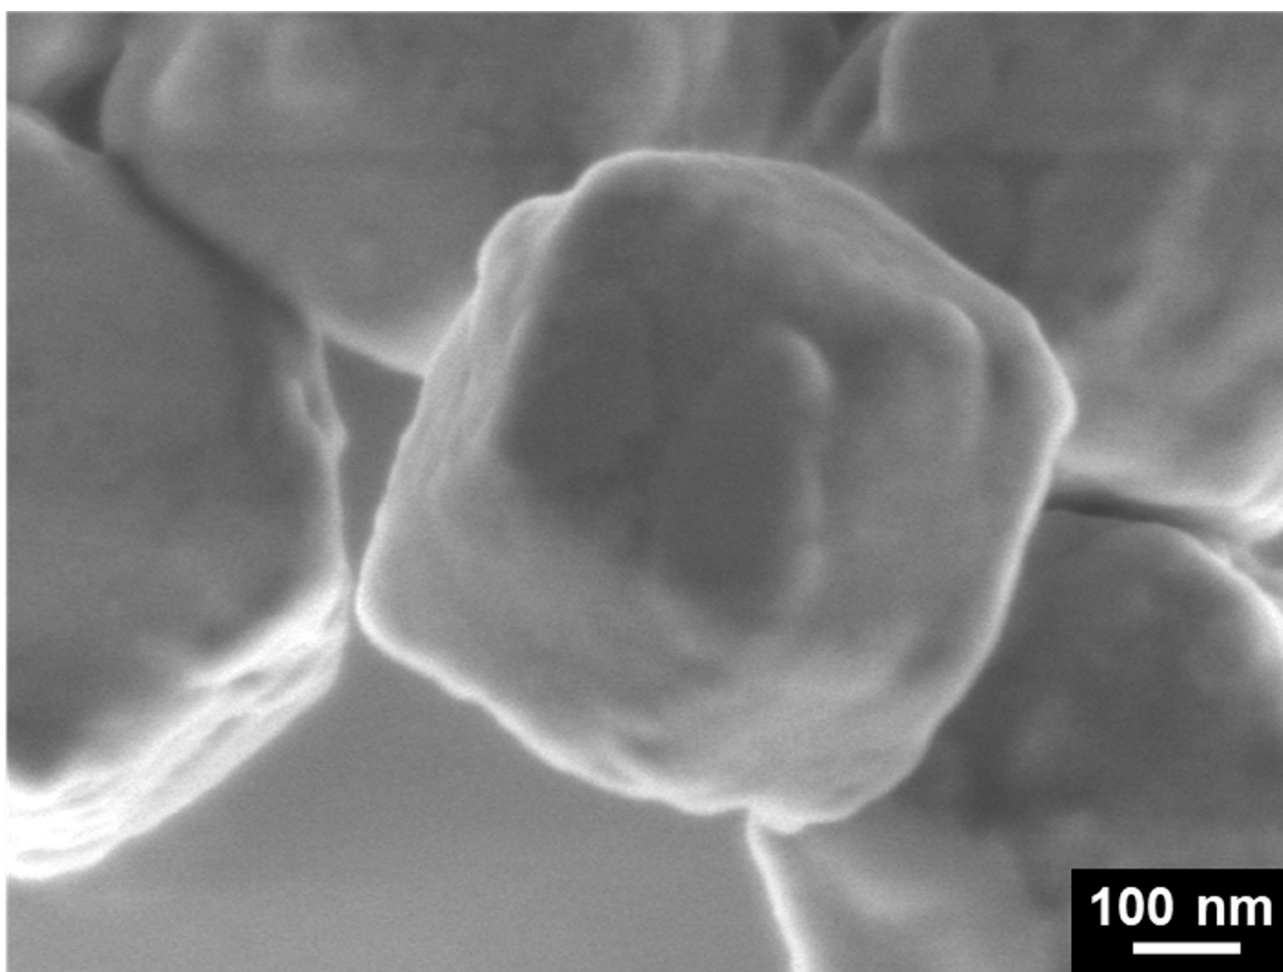

**Fig. S8.** A typical SEM image of etched  $\text{Zn}_{33}\text{Co}_{67}$ -ZIF prepared with 95EG : 5DW using a sonication time of 3 hours.



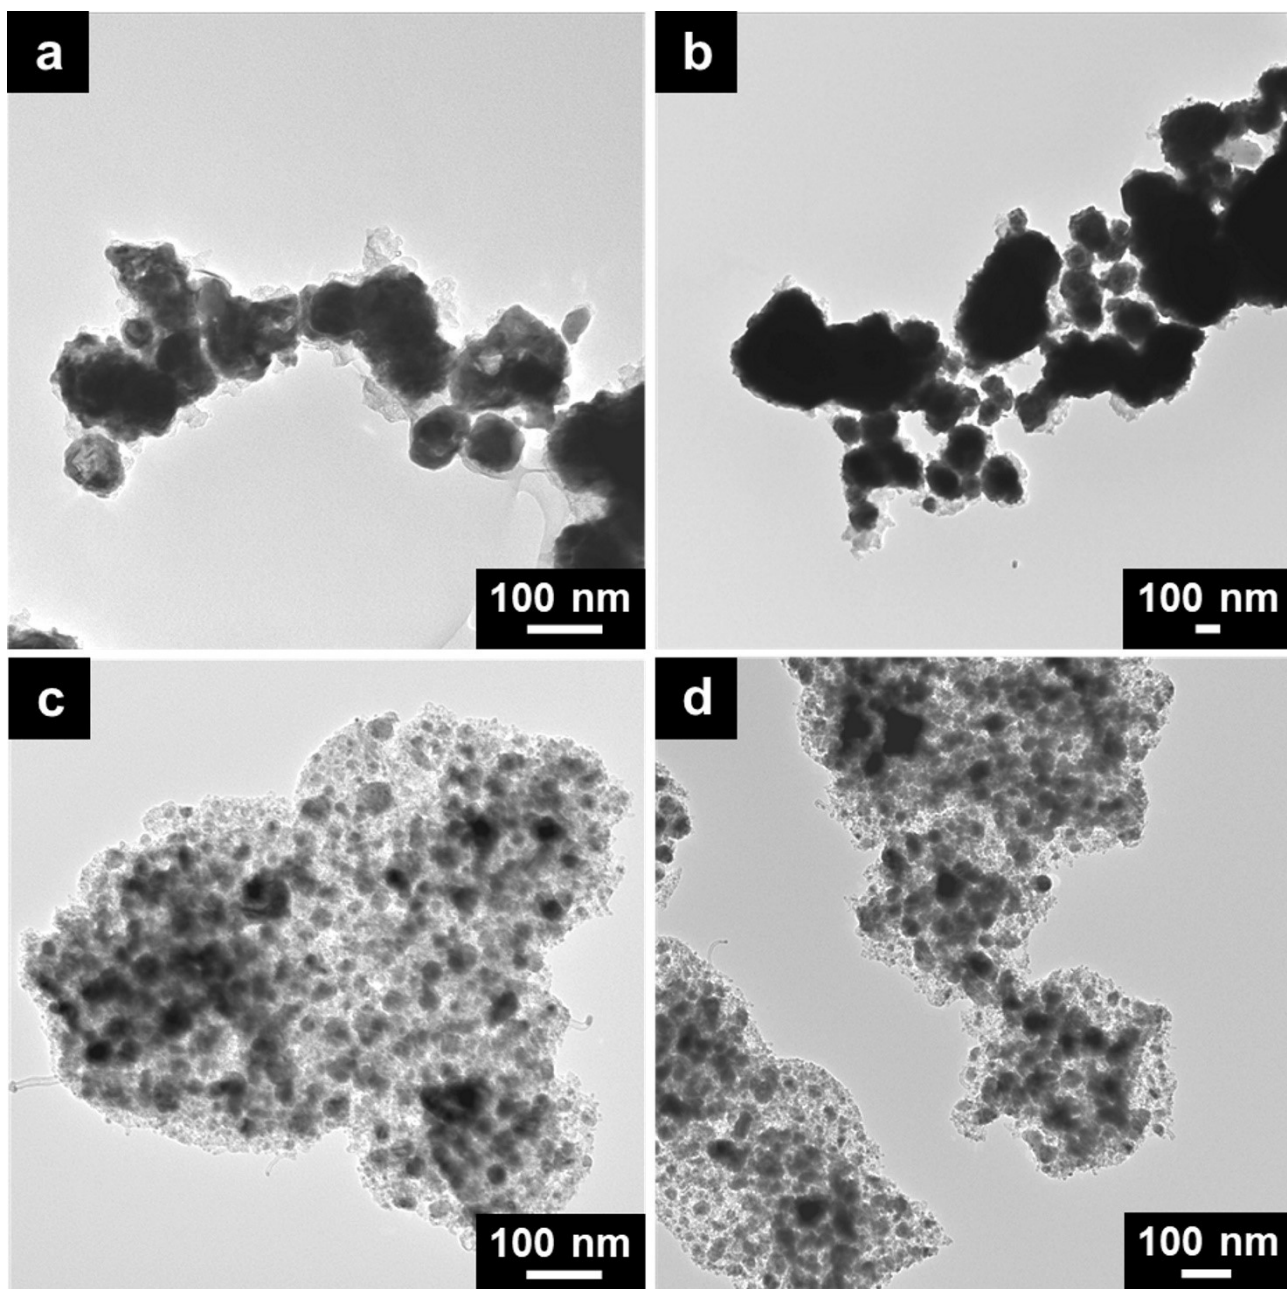

**Fig. S9.** TEM images of etched  $\text{Zn}_{33}\text{Co}_{67}$ -ZIF calcined at (a, b) 800 °C and (c, d) 600 °C before 2 M HCl acid treatment. Note: Black particles are Co nanoparticles in the carbon matrix.

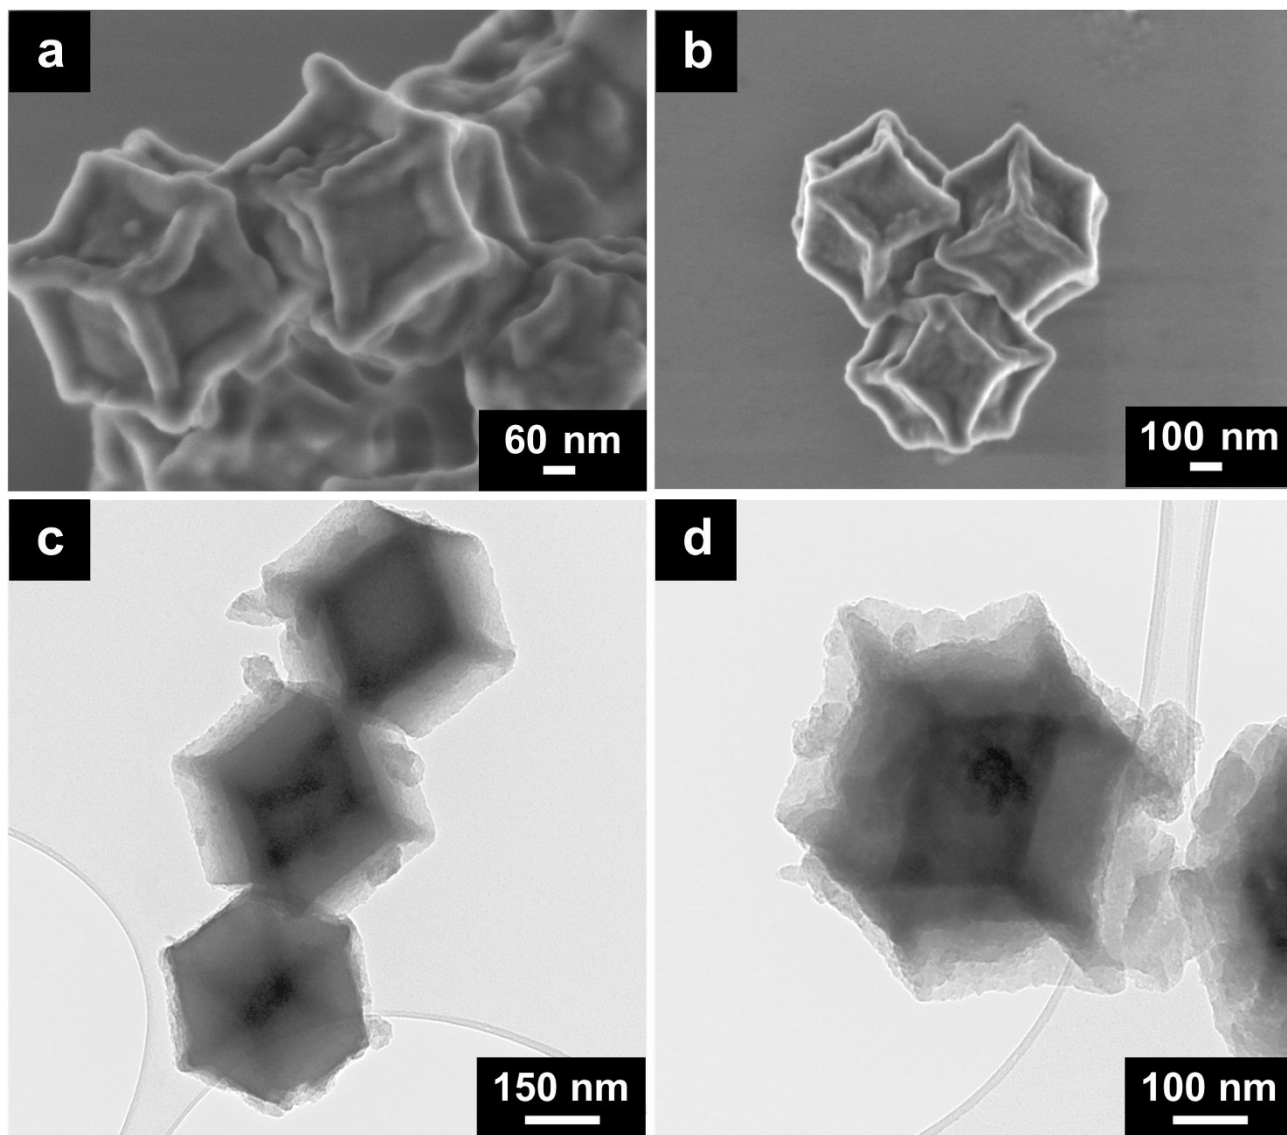

**Fig. S10.** (a, b) SEM and (c, d) TEM images of Zn-C.

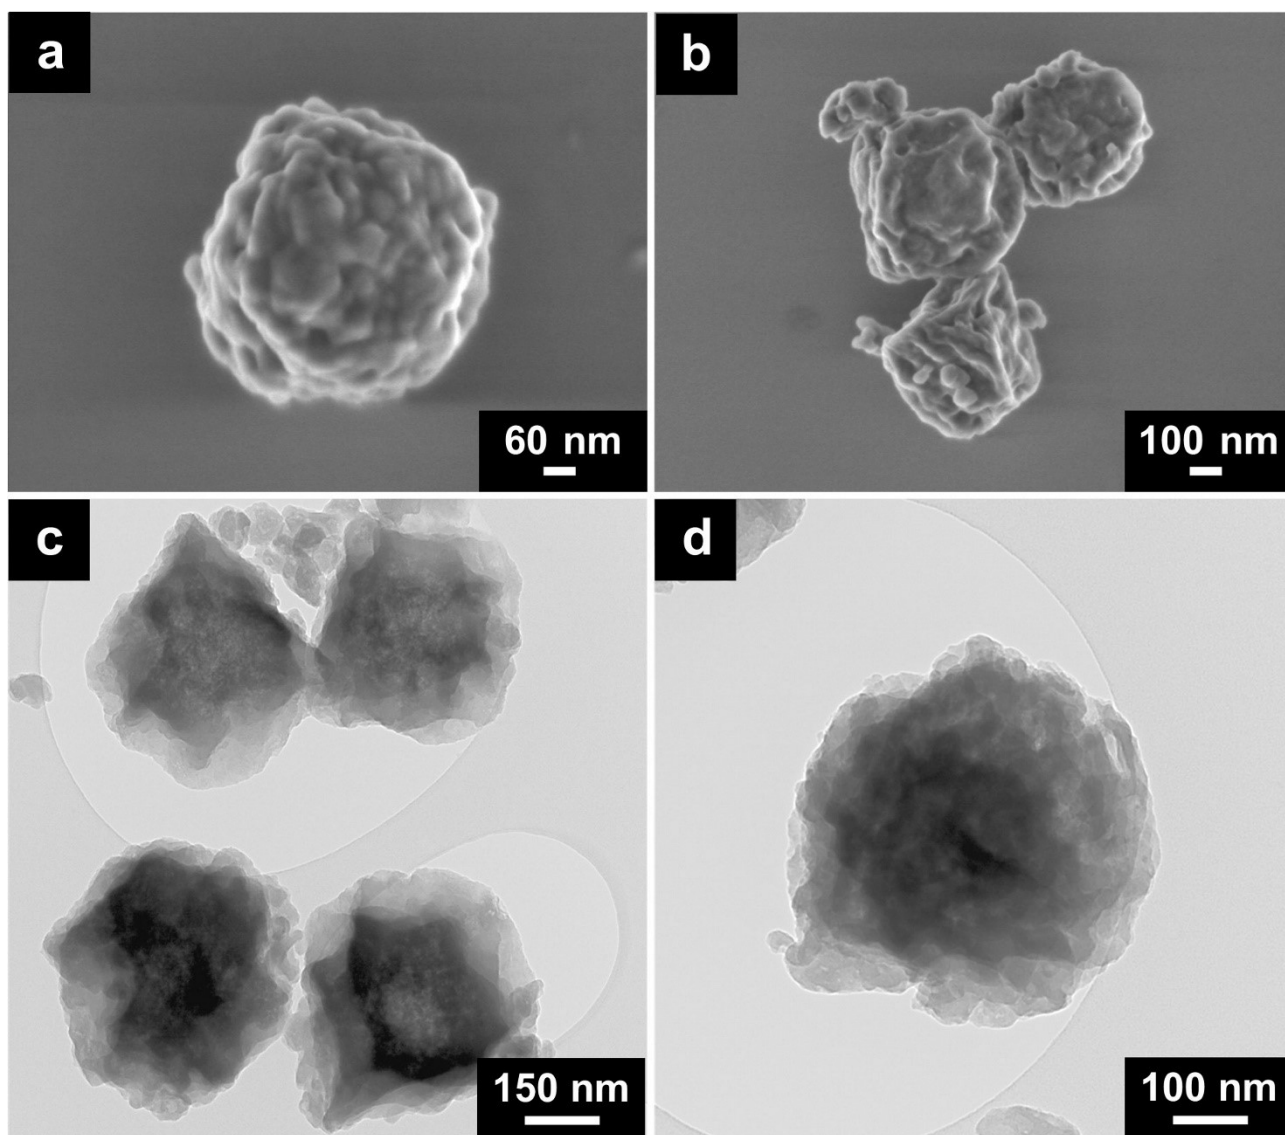

**Fig. S11.** (a, b) SEM and (c, d) TEM images of etched Zn-C.

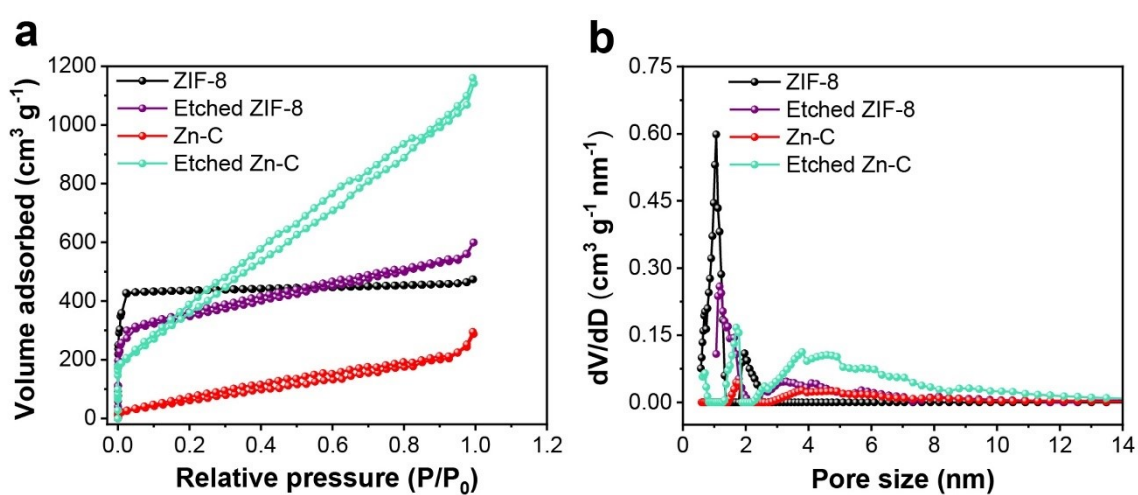

**Fig. S12.** (a) N<sub>2</sub> adsorption-desorption isotherms and (b) pore size distribution curves of ZIF-8, etched ZIF-8, Zn-C, and etched Zn-C.

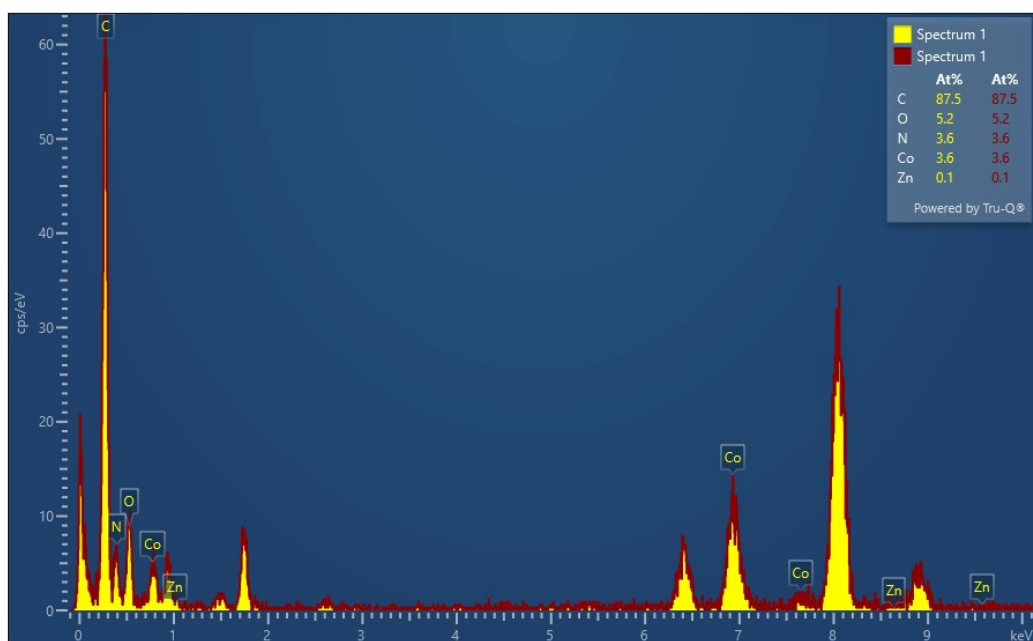

**Fig. S13.** The EDS spectrum of  $Zn_{33}Co_{67}-C$ .

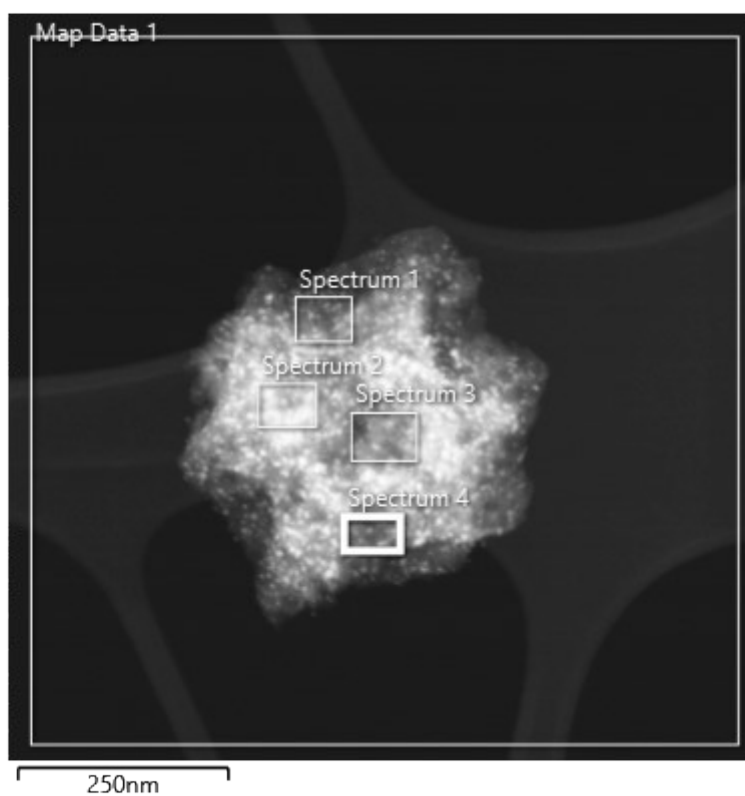

**Fig. S14.** The dark-field STEM image of  $Zn_{33}Co_{67}-C$  marked with the four selected areas for EDS elemental analysis.

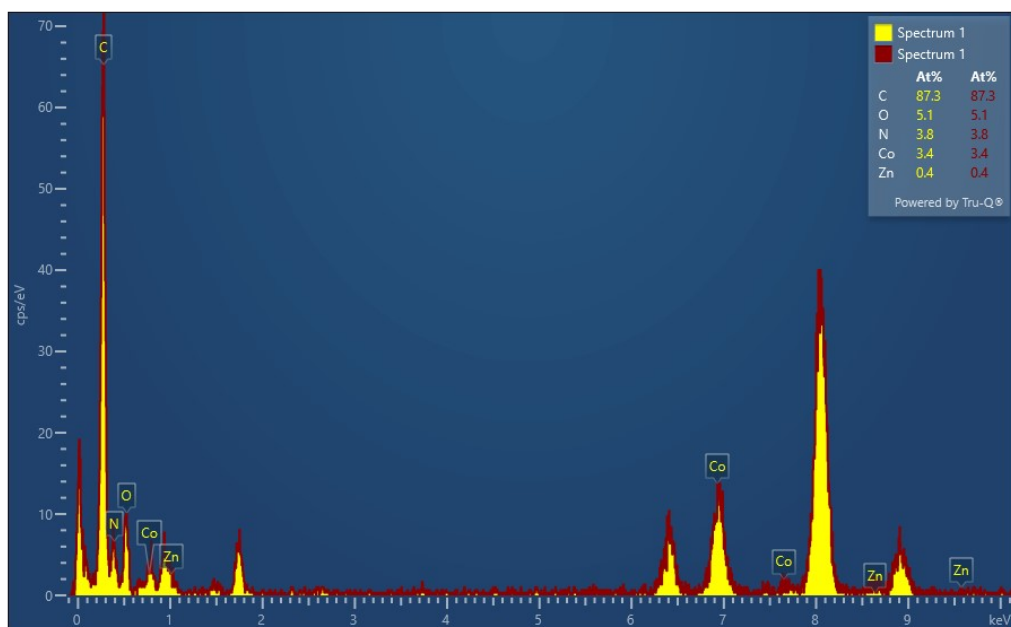

**Fig. S15.** The EDS spectrum of etched  $Zn_{33}Co_{67}-C$ .

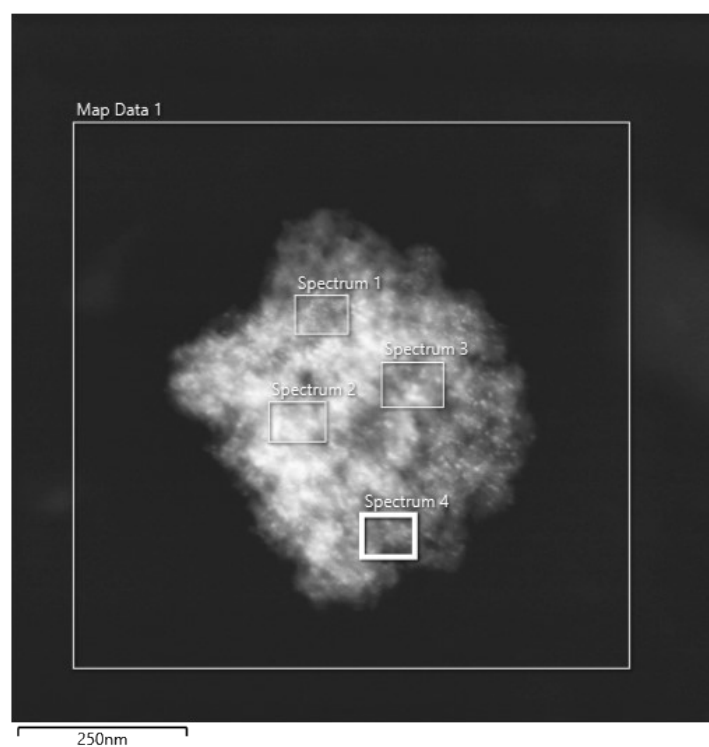

**Fig. S16.** The dark-field STEM image of etched  $Zn_{33}Co_{67}-C$  marked with the four selected areas for EDS elemental analysis.

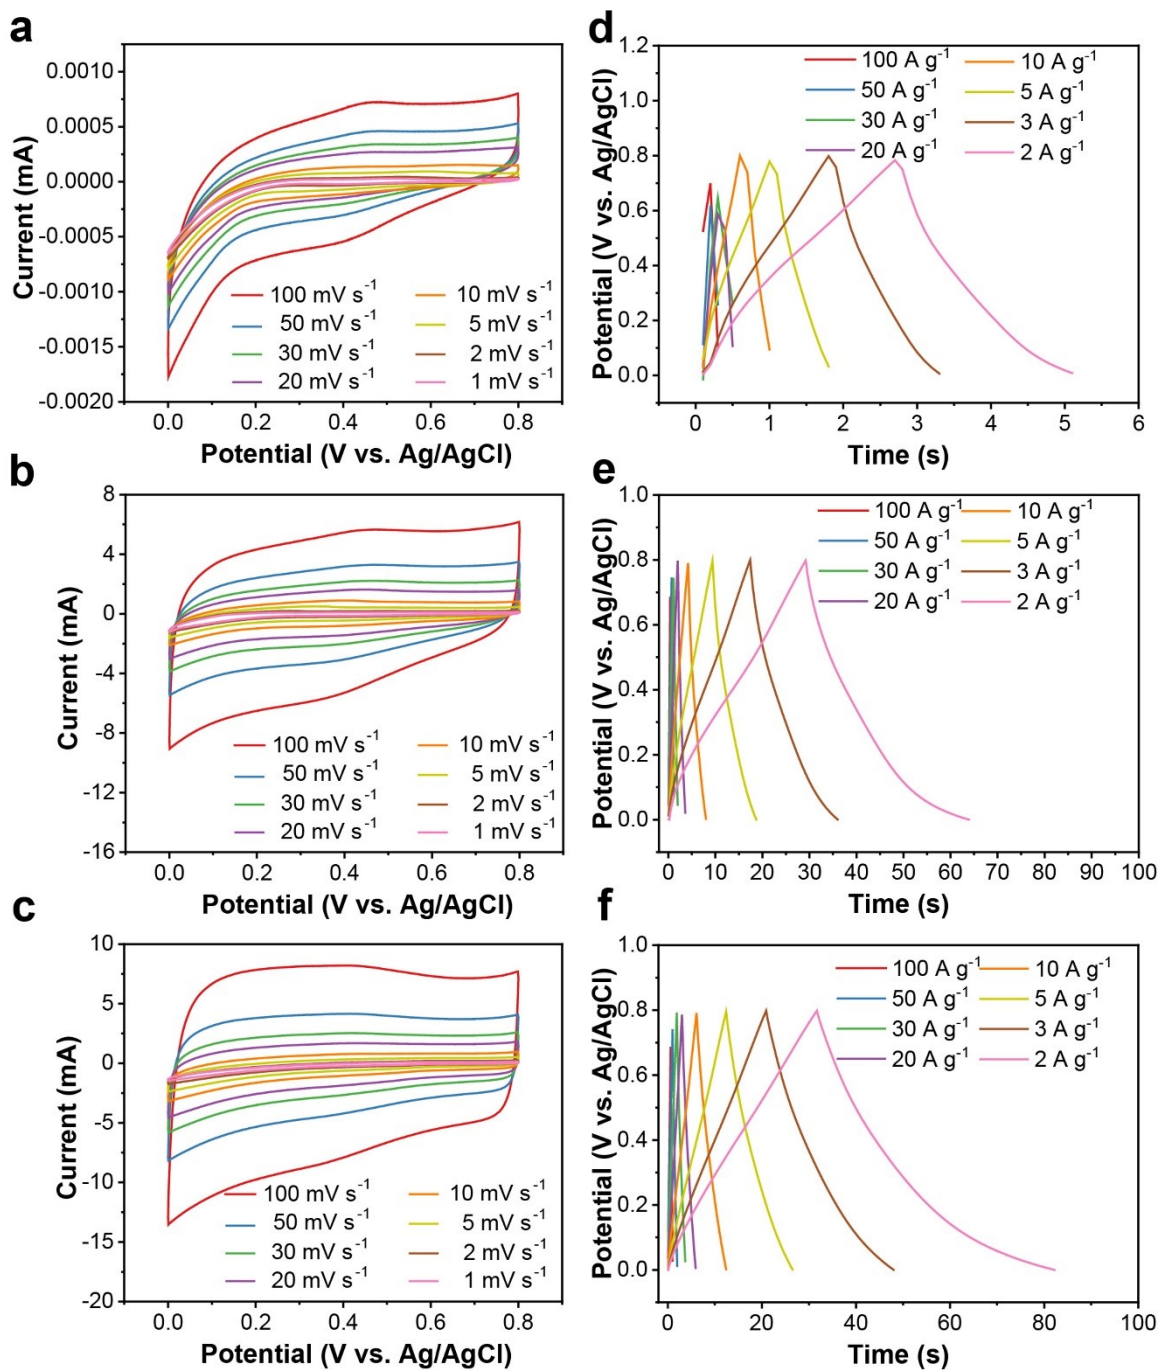

**Fig. S17.** Cyclic voltammograms at various scan rates for (a) Zn-C, (b) Zn<sub>33</sub>Co<sub>67</sub>-C, and (c) etched Zn<sub>33</sub>Co<sub>67</sub>-C electrodes. Galvanostatic charge-discharge curves at various current densities for (d) Zn-C (e) Zn<sub>33</sub>Co<sub>67</sub>-C, and (f) etched Zn<sub>33</sub>Co<sub>67</sub>-C electrodes. All measurements were conducted in 1.0 M H<sub>2</sub>SO<sub>4</sub> solution as the electrolyte.

**Table S1.** Specific surface areas and pore volume of ZIF-8, etched ZIF-8, Zn<sub>33</sub>Co<sub>67</sub>-ZIF, and etched Zn<sub>33</sub>Co<sub>67</sub>-ZIF.

| Sample                                        | $S_{\text{BET}}$ (m <sup>2</sup> g <sup>-1</sup> ) | Pore volume (cm <sup>3</sup> g <sup>-1</sup> ) |
|-----------------------------------------------|----------------------------------------------------|------------------------------------------------|
| ZIF-8                                         | 1889                                               | 0.672                                          |
| Etched ZIF-8                                  | 1288                                               | 0.822                                          |
| Zn <sub>33</sub> Co <sub>67</sub> -ZIF        | 1843                                               | 0.686                                          |
| Etched Zn <sub>33</sub> Co <sub>67</sub> -ZIF | 2142                                               | 1.743                                          |

**Table S2.** Raman band assignments for ZIF-8 and Zn<sub>33</sub>Co<sub>67</sub>-ZIF.

| Raman shift (cm <sup>-1</sup> ) | Band assignment                   |
|---------------------------------|-----------------------------------|
| 282                             | Zn-N stretching                   |
| 300                             | Co-N stretching                   |
| 420                             | Co-N stretching                   |
| 682                             | Imidazolium ring puckering        |
| 839                             | C-H out of plane bending (C4-C5)  |
| 1019                            | C-H out of plane bending          |
| 1145                            | C5-N stretching                   |
| 1184                            | C-N stretching                    |
| 1312                            | ring expansion, N-H wag           |
| 1387                            | CH <sub>3</sub> bending           |
| 1457                            | C-H bending                       |
| 1509                            | C4=C5 stretching                  |
| 2928                            | C-H stretching (methyl)           |
| 3115                            | C-H stretching (imidazolium ring) |
| 3130                            | C-H stretching (imidazolium ring) |

**Table S3.** FT-IR band assignments for ZIF-8, etched ZIF-8, Zn<sub>33</sub>Co<sub>67</sub>-ZIF, and etched Zn<sub>33</sub>Co<sub>67</sub>-ZIF.

| Wavenumber (cm <sup>-1</sup> ) | Band assignment                    |
|--------------------------------|------------------------------------|
| 694                            | <i>sp</i> <sup>3</sup> C-H bending |
| 759                            | <i>sp</i> <sup>2</sup> C-H bending |
| 995                            | C=C bending                        |
| 1145                           | C-N stretching                     |
| 1309                           | <i>sp</i> <sup>3</sup> C-H bending |
| 1432                           | <i>sp</i> <sup>3</sup> C-H bending |
| 1585                           | C=N stretching                     |

**Table S4.** Specific surface areas (*S*<sub>BET</sub>) and pore volume of Zn<sub>33</sub>Co<sub>67</sub>-C and etched Zn<sub>33</sub>Co<sub>67</sub>-C.

| Sample                                      | <i>S</i> <sub>BET</sub> (m <sup>2</sup> g <sup>-1</sup> ) | Pore volume (cm <sup>3</sup> g <sup>-1</sup> ) | <i>V</i> <sub>micro</sub> (cm <sup>3</sup> g <sup>-1</sup> ) | <i>V</i> <sub>meso</sub> (cm <sup>3</sup> g <sup>-1</sup> ) |
|---------------------------------------------|-----------------------------------------------------------|------------------------------------------------|--------------------------------------------------------------|-------------------------------------------------------------|
| Zn <sub>33</sub> Co <sub>67</sub> -C        | 1339                                                      | 1.616                                          | 0.299                                                        | 1.317                                                       |
| Etched Zn <sub>33</sub> Co <sub>67</sub> -C | 521.0                                                     | 0.835                                          | 0.101                                                        | 0.734                                                       |

**Table S5.** XPS elemental analysis (at%) of Zn<sub>33</sub>Co<sub>67</sub>-C and etched Zn<sub>33</sub>Co<sub>67</sub>-C.

| Sample                                      | C     | N    | O    | Zn   | Co   |
|---------------------------------------------|-------|------|------|------|------|
| Zn <sub>33</sub> Co <sub>67</sub> -C        | 79.56 | 9.58 | 5.10 | 1.33 | 4.43 |
| Etched Zn <sub>33</sub> Co <sub>67</sub> -C | 81.87 | 7.86 | 6.35 | 0.94 | 2.98 |



**Table S6.** EDS elemental analysis (at%) of Zn<sub>33</sub>Co<sub>67</sub>-C and etched Zn<sub>33</sub>Co<sub>67</sub>-C.

| <b>Zn<sub>33</sub>Co<sub>67</sub>-C</b>        |              |             |             |             |             |
|------------------------------------------------|--------------|-------------|-------------|-------------|-------------|
| Spectrum area                                  | C            | N           | O           | Zn          | Co          |
| 1                                              | 87.52        | 3.61        | 5.19        | 0.10        | 3.58        |
| 2                                              | 87.45        | 4.28        | 3.83        | 0.24        | 4.20        |
| 3                                              | 88.32        | 4.01        | 4.10        | 0.18        | 3.39        |
| 4                                              | 84.27        | 3.40        | 6.44        | 0.35        | 5.54        |
| <b>Average</b>                                 | <b>86.89</b> | <b>3.83</b> | <b>4.89</b> | <b>0.22</b> | <b>4.18</b> |
| <b>St. dev</b>                                 | <b>1.55</b>  | <b>0.34</b> | <b>1.03</b> | <b>0.09</b> | <b>0.84</b> |
| <b>Etched Zn<sub>33</sub>Co<sub>67</sub>-C</b> |              |             |             |             |             |
| Spectrum area                                  | C            | N           | O           | Zn          | Co          |
| 1                                              | 87.30        | 3.77        | 5.12        | 0.40        | 3.41        |
| 2                                              | 86.00        | 5.43        | 4.73        | 0.22        | 3.62        |
| 3                                              | 87.30        | 4.27        | 4.67        | 0.12        | 3.64        |
| 4                                              | 86.20        | 5.00        | 4.78        | 0.26        | 3.76        |
| <b>Average</b>                                 | <b>86.70</b> | <b>4.62</b> | <b>4.83</b> | <b>0.25</b> | <b>3.61</b> |
| <b>St. dev</b>                                 | <b>0.60</b>  | <b>0.64</b> | <b>0.17</b> | <b>0.10</b> | <b>0.13</b> |

**Table S7.** EDS elemental analysis (wt%) of Zn<sub>33</sub>Co<sub>67</sub>-C and etched Zn<sub>33</sub>Co<sub>67</sub>-C.

| <b>Zn<sub>33</sub>Co<sub>67</sub>-C</b>        |              |             |             |             |              |
|------------------------------------------------|--------------|-------------|-------------|-------------|--------------|
| Spectrum area                                  | C            | N           | O           | Zn          | Co           |
| 1                                              | 74.96        | 3.60        | 5.93        | 0.47        | 15.04        |
| 2                                              | 73.20        | 4.18        | 4.27        | 1.11        | 17.24        |
| 3                                              | 76.09        | 4.03        | 4.69        | 0.85        | 14.34        |
| 4                                              | 66.94        | 3.15        | 6.82        | 1.51        | 21.58        |
| <b>Average</b>                                 | <b>72.80</b> | <b>3.74</b> | <b>5.43</b> | <b>0.99</b> | <b>17.05</b> |
| <b>St. dev</b>                                 | <b>3.54</b>  | <b>0.40</b> | <b>1.01</b> | <b>0.38</b> | <b>2.83</b>  |
| <b>Etched Zn<sub>33</sub>Co<sub>67</sub>-C</b> |              |             |             |             |              |
| Spectrum area                                  | C            | N           | O           | Zn          | Co           |
| 1                                              | 74.34        | 3.74        | 5.81        | 1.87        | 14.24        |
| 2                                              | 73.15        | 5.38        | 5.37        | 1.01        | 15.09        |
| 3                                              | 74.59        | 4.25        | 5.32        | 0.57        | 15.27        |
| 4                                              | 72.89        | 4.93        | 5.38        | 1.21        | 15.59        |
| <b>Average</b>                                 | <b>73.74</b> | <b>4.58</b> | <b>5.47</b> | <b>1.17</b> | <b>15.05</b> |
| <b>St. dev</b>                                 | <b>0.73</b>  | <b>0.63</b> | <b>0.20</b> | <b>0.47</b> | <b>0.50</b>  |
